## Neonatal Neurobehavioral Effects of Inhalation Analgesia for Vaginal Delivery

Stephen J. Stefani, M.D.,\* Samuel C. Hughes, M.D.,† Sol M. Shnider, M.D.,‡ Gershon Levinson, M.D.,§  
Therese K. Abboud, M.D.,¶, Eva H. Henriksen, M.D.,\*\* Virginia Williams, M.D.,†† Judy Johnson‡‡

The authors studied the neonatal neurobehavioral effects of nitrous oxide:oxygen and enflurane:oxygen inhalation analgesia for vaginal delivery. Parturients were assigned randomly to receive no inhalation agent (Group 1, n = 21); enflurane, 0.3 to 0.8 per cent, and oxygen (Group 2, n = 22); or nitrous oxide, 30 to 50 per cent, and oxygen (Group 3, n = 18). Infants were tested at 15 min, 2 h, and 24 h of age using the Neurologic and Adaptive Capacity Score (NACS); and at 2 and 24 h using the Early Neonatal Neurobehavioral Scale (ENNS). No significant differences in neurobehavioral status occurred. For all groups, scores tended to be lowest at two hours of age. We conclude that neither enflurane nor nitrous oxide analgesia adversely affects neonatal neurobehavioral status at 15 min, 2 h, or 24 h of age. (Key words: Anesthesia: obstetric. Anesthetics, gases: nitrous oxide. Anesthetics, volatile: enflurane. Neurobehavior: neonatal.)

SUBANESTHETIC DOSES of most of the inhalation anesthetics have long been used to provide analgesia during the second stage of labor.<sup>1-7</sup> We previously reported that when compared with nitrous oxide, enflurane provides excellent analgesia, has a high degree of patient acceptance, and induces minimal maternal amnesia for delivery. Also, enflurane does not increase uterine bleeding or significantly elevate maternal or neonatal serum or inorganic fluoride levels in the urine or blood serum of

the mother or neonate. No biochemical evidence of renal toxicity has been demonstrated.<sup>8</sup> Furthermore, no differences in neonatal acid-base status or clinical condition at birth, as ascertained by Apgar scores or time-to-sustained respiration, are detectable. However, *anesthetic* doses of inhalation agents have been reported to depress the neurobehavioral condition of the neonate.<sup>9,10</sup> Therefore, we evaluated the possible neurobehavioral effects of subanesthetic concentrations of nitrous oxide and enflurane. We used two tests of neonatal neurobehavioral status, the Early Neonatal Neurobehavioral Scale (ENNS), described by Scanlon,<sup>11</sup> and the Neurologic and Adaptive Capacity Score (NACS), which was developed by Amiel-Tison, Barrier, and Shnider.<sup>12</sup> In contrast to the Apgar score, both examinations detect subtle neurobehavioral changes in the neonate. Indeed, many babies with normal Apgar scores have demonstrable neurobehavioral changes within the first few hours of life.<sup>13</sup>

### Methods

After receiving informed consent and approval from the Committee on Human Research, we studied 61 healthy, full-term parturients who were assigned randomly to one of three groups. Group 1 (n = 21) received no inhalation analgesia. Group 2 (n = 22) received enflurane, 0.3 to 0.8 per cent, in oxygen. Group 3 (n = 18) received nitrous oxide, 30 to 50 per cent, in oxygen. An anesthesiologist administered the analgesic mixture during the second stage of labor. We adjusted the concentration of each agent to provide optimal analgesia while keeping the patient awake, cooperative, and oriented. Blood pressure was measured every 2 min, and maternal EKG was monitored continuously. At the moment of birth, the analgesic mixture was discontinued and the mother's attention directed toward her infant. Effectiveness of inhalation analgesia was evaluated by the mother and the anesthesiologist, who gave it a score of 0 (no relief) to 4+ (excellent pain relief).<sup>1</sup> Umbilical arterial and venous blood samples were obtained from a doubly clamped segment of cord for determination of fetal oxygenation and acid-base status. The pediatrician or obstetrician determined time-to-sustained respiration and Apgar scores at 1 and 5 min. The patient's age, parity, method of delivery, dose of narcotic, time of administration of narcotic during labor, and the local anesthetic technique used for delivery were noted. Two

\* Research Fellow in Obstetrical Anesthesia, University of California, San Francisco. Present address: Department of Anesthesia, University of Iowa Hospital and Clinics, Iowa City, Iowa.

† Assistant Professor of Anesthesia, University of California, San Francisco.

‡ Professor of Anesthesia, Obstetrics, Gynecology and Reproductive Sciences, University of California, San Francisco.

§ Associate Professor of Anesthesia, Obstetrics, Gynecology and Reproductive Sciences, University of California, San Francisco.

¶ Associate Professor of Clinical Anesthesia, University of Southern California.

\*\* Associate Professor of Anesthesia, University of Southern California.

†† Research Fellow in Obstetrical Anesthesia, University of Southern California.

‡‡ Staff Research Associate, University of California, San Francisco.

Received from the Departments of Anesthesia, Obstetrics, Gynecology and Reproductive Sciences, University of California, San Francisco, California 94143, and the Department of Anesthesia, University of Southern California, Los Angeles, California 90024. Accepted for publication August 22, 1981. Presented in part at the annual meeting of the American Society of Anesthesiologists, St. Louis, October 1980. Supported in part by NIH Anesthesia Research Center Grant GM 15571.

Address reprint requests to Dr. Shnider: Department of Anesthesia, University of California, Room M1498, Third and Parnassus Avenues, San Francisco, California 94143.

TABLE 1. Comparison of Patients Who Received Nitrous Oxide or Enflurane Analgesia for Vaginal Delivery, or No Inhalation Analgesia (Controls)

|                                                              | Controls<br>(n = 20) | N <sub>2</sub> O:O <sub>2</sub><br>(n = 18) | Enflurane:O <sub>2</sub><br>(n = 22) |
|--------------------------------------------------------------|----------------------|---------------------------------------------|--------------------------------------|
| Method of delivery (per cent)                                |                      |                                             |                                      |
| Spontaneous                                                  | 90                   | 95                                          | 83                                   |
| Outlet forceps                                               | 10                   | 0                                           | 13                                   |
| Mid-forceps                                                  | 0                    | 5                                           | 0                                    |
| Vacuum                                                       | 0                    | 0                                           | 4                                    |
| Narcotic administration during labor (per cent)              |                      |                                             |                                      |
| None                                                         | 70                   | 50                                          | 59                                   |
| Within 1 hour of delivery                                    | 15                   | 6                                           | 14                                   |
| 1-2 hours of delivery                                        | 10                   | 22                                          | 9                                    |
| ≥2 hours of delivery                                         | 5                    | 22                                          | 18                                   |
| Local anesthesia for delivery (per cent)                     |                      |                                             |                                      |
| None                                                         | 40                   | 28                                          | 43                                   |
| Local infiltration and/or pudendal block                     | 60                   | 72                                          | 57                                   |
| Duration of inhalation analgesia antepartum (per cent)       |                      |                                             |                                      |
| <5 min                                                       |                      | 11                                          | 14                                   |
| 6-10 min                                                     |                      | 39                                          | 28                                   |
| 11-20 min                                                    |                      | 22                                          | 36                                   |
| 21-39 min                                                    |                      | 22                                          | 28                                   |
| >40 min                                                      |                      | 6                                           | 5                                    |
| MEAN (±SE) duration of antepartum inhalation analgesia (min) |                      | 14.8 ± 2.4                                  | 16.5 ± 4.1                           |
| Satisfactory (3+ and 4+) analgesia scores (per cent)         |                      |                                             |                                      |
| Mother                                                       |                      | 73                                          | 91                                   |
| Doctor                                                       |                      | 66                                          | 82                                   |

examiners, "blind" to both the nature and duration of the analgesia, simultaneously evaluated and scored the neurobehavioral status of the infants. The examinations were performed at 15 min in the delivery room using the NACS, and at 2 and 24 h using the NACS and the ENNS. The examiners were either anesthesiologists or

staff research associates trained to perform their respective examinations by Amiel-Tison (NACS) or Scanlon (ENNS), or persons trained by these pediatricians. The NACS, unlike the ENNS, gives a total score, the maximum being 40. Arbitrarily choosing 35 to 40 as the score denoting a vigorous baby,<sup>12</sup> we determined the percentages of infants scoring 35 or higher and compared these in each study group at 15 min, 2 h, and 24 h. For both the NACS and the ENNS, we also determined the percentages of infants having high scores on each of the individual test items (*i.e.*, for the NACS, those having a score of 2, and for the ENNS, those having a score of 2 or 3). The results were analyzed using a two- or three-way chi-square test, where appropriate, or a Student *t* test for unpaired data (blood gases). A *P* value of less than 0.05 was considered significant.

### Results

Each group was similar with respect to method of delivery, administration of narcotics during labor, administration of local anesthetics for delivery, and, in the groups receiving inhalation analgesic, the duration and effectiveness of analgesia prior to birth (table 1). Over 80 per cent of the parturients in each group delivered spontaneously; 50 to 70 per cent received no narcotics during labor. The remainder received small doses of either meperidine (50 mg) or alphaprodine (20 to 30 mg).

TABLE 2. Comparison of Neonates Whose Mothers Received Nitrous Oxide or Enflurane Analgesia for Vaginal Delivery, or No Inhalation Analgesia (Controls)\*

|                                          | Controls<br>(n = 20) | N <sub>2</sub> O:O <sub>2</sub><br>(n = 18) | Enflurane:O <sub>2</sub><br>(n = 22) |
|------------------------------------------|----------------------|---------------------------------------------|--------------------------------------|
| Mean (±SE) birth weight (g)              | 3,312 ± 120          | 3,321 ± 67.7                                | 3,436 ± 85.9                         |
| Time-to-sustained respiration (per cent) |                      |                                             |                                      |
| <90 s                                    | 100                  | 100                                         | 100                                  |
| >90 s                                    | 0                    | 0                                           | 0                                    |
| Apgar scores                             |                      |                                             |                                      |
| At 1 min (per cent)                      |                      |                                             |                                      |
| 0-4                                      | 13                   | 0                                           | 4                                    |
| 5-7                                      | 9                    | 21                                          | 21                                   |
| 8-10                                     | 78                   | 79                                          | 75                                   |
| At 5 min (per cent)                      |                      |                                             |                                      |
| 0-4                                      | 0                    | 0                                           | 0                                    |
| 5-7                                      | 0                    | 0                                           | 0                                    |
| 8-10                                     | 100                  | 100                                         | 100                                  |

\* No significant differences.

TABLE 3. Blood-Gas Data for Neonates Whose Mothers Received Nitrous Oxide or Enflurane Analgesia for Vaginal Delivery, or No Inhalation Analgesia (Controls)\*

|                                    | Controls<br>(n = 20) | N <sub>2</sub> O:O <sub>2</sub><br>(n = 18) | Enflurane:O <sub>2</sub><br>(n = 22) |
|------------------------------------|----------------------|---------------------------------------------|--------------------------------------|
| Umbilical vein                     |                      |                                             |                                      |
| pH                                 | 7.36 ± 0.01          | 7.33 ± 0.01                                 | 7.36 ± 0.01                          |
| P <sub>CO<sub>2</sub></sub> (mmHg) | 35.0 ± 1.5           | 37.3 ± 1.0                                  | 36.1 ± 1.3                           |
| Base excess (mEq/l)                | -5.2 ± 0.3           | -5.6 ± 0.6                                  | -4.8 ± 0.5                           |
| P <sub>O<sub>2</sub></sub> (mmHg)  | 29.4 ± 1.1           | 30.6 ± 1.5                                  | 30.0 ± 1.1                           |
| Umbilical artery                   |                      |                                             |                                      |
| pH                                 | 7.28 ± 0.01          | 7.26 ± 0.02                                 | 7.30 ± 0.01                          |
| P <sub>CO<sub>2</sub></sub> (mmHg) | 42.5 ± 2.2           | 45.3 ± 1.6                                  | 44.4 ± 1.5                           |
| Base excess (mEq/l)                | -6.1 ± 0.7           | -7.2 ± 0.7                                  | -4.4 ± 0.5                           |
| P <sub>O<sub>2</sub></sub> (mmHg)  | 18.9 ± 1.0           | 18.9 ± 1.0                                  | 19.6 ± 1.0                           |

\* No significant differences.

Approximately two-thirds of the patients received a pudendal block and/or infiltration of local anesthetic at the time of delivery. The weight and clinical condition of neonates at birth were similar in all three groups (table 2). All babies established sustained respirations within 90 s and had Apgar scores of 8 or higher at 5 min. Results of analysis of umbilical venous and arterial blood samples for blood gases and acid-base status were also similar for the three groups (table 3).

The testing of neurobehavioral status revealed no statistically significant differences in test scores for any test item on either the NACS (table 4) or the ENNS (table 5) at any of the times of testing. The percentages of infants who scored 35 to 40 on the NACS were not significantly different in the three groups (fig. 1). High scores were found at 15 min after birth in 78 per cent of the infants in the control group, in 77 per cent of the infants whose mothers had received nitrous oxide, and in 83 per cent of the infants whose mothers had received enflurane. Although infants scored significantly lower at 2 h than at 24 h, there were no statistically significant differences between the scores of the three groups. At 24 h, approximately 90 per cent of the infants in all three groups had high scores. The ENNS, using the mean of the percentages of good scores on all test items, also showed that infants in all three groups had similar neurobehavioral status at 2 and 24 h (fig. 2). As with the NACS, infants scored lower at 2 h than at 24 h.

The scores of those infants whose mothers had received systemic narcotics within six hours of delivery were then compared with scores for infants whose mothers had received no narcotic. No individual test item on either the NACS or ENNS was found to be statistically different at any of the times of testing. The percentages of infants

TABLE 4. Percentages of Infants Who Scored 2 for Each Test Item of the Neurologic and Adaptive Capacity Score (NACS)\* and Whose Mothers Had Received N<sub>2</sub>O or Enflurane Analgesia for Vaginal Delivery, or No Inhalation Analgesia (Controls)

|                      | 15 min  |                  |           | 2 h     |                  |           | 24 h    |                  |           |
|----------------------|---------|------------------|-----------|---------|------------------|-----------|---------|------------------|-----------|
|                      | Control | N <sub>2</sub> O | Enflurane | Control | N <sub>2</sub> O | Enflurane | Control | N <sub>2</sub> O | Enflurane |
| Adaptive capacity    |         |                  |           |         |                  |           |         |                  |           |
| Sound                | 65      | 74               | 91        | 38      | 37               | 44        | 45      | 68               | 46        |
| Habituation to sound | 82      | 68               | 91        | 57      | 74               | 65        | 70      | 78               | 71        |
| Light                | 90      | 84               | 96        | 65      | 68               | 55        | 86      | 84               | 63        |
| Habituation to light | 70      | 63               | 88        | 55      | 74               | 71        | 68      | 84               | 75        |
| Consolability        | 90      | 95               | 100       | 95      | 95               | 96        | 77      | 94               | 92        |
| Passive tone         |         |                  |           |         |                  |           |         |                  |           |
| Scarf sign           | 86      | 90               | 91        | 81      | 84               | 96        | 96      | 100              | 100       |
| Elbow recoil         | 82      | 79               | 96        | 91      | 84               | 96        | 100     | 100              | 100       |
| Lower limb recoil    | 86      | 95               | 96        | 86      | 90               | 100       | 100     | 100              | 100       |
| Popliteal angle      | 82      | 84               | 83        | 81      | 84               | 78        | 91      | 94               | 92        |
| Active tone          |         |                  |           |         |                  |           |         |                  |           |
| Neck flexors         | 77      | 68               | 88        | 71      | 63               | 70        | 91      | 94               | 88        |
| Neck extensors       | 73      | 74               | 88        | 62      | 63               | 74        | 86      | 94               | 92        |
| Palmar traction      | 86      | 90               | 96        | 67      | 68               | 87        | 82      | 94               | 96        |
| Support reaction     | 91      | 74               | 83        | 81      | 63               | 78        | 100     | 100              | 79        |
| Primary reflexes     |         |                  |           |         |                  |           |         |                  |           |
| Palmar grasp         | 86      | 95               | 96        | 81      | 79               | 78        | 91      | 89               | 100       |
| Automatic walking    | 64      | 90               | 83        | 57      | 47               | 65        | 77      | 73               | 67        |
| Sucking              | 36      | 47               | 50        | 67      | 79               | 92        | 96      | 89               | 96        |
| Moro response        | 90      | 90               | 96        | 95      | 90               | 96        | 100     | 94               | 96        |
| General assessment   |         |                  |           |         |                  |           |         |                  |           |
| Alertness            | 91      | 90               | 96        | 76      | 84               | 96        | 96      | 100              | 100       |
| Crying               | 91      | 100              | 91        | 91      | 94               | 96        | 96      | 95               | 100       |
| Motor activity       | 86      | 95               | 91        | 91      | 90               | 100       | 100     | 100              | 100       |

\* No significant differences.

TABLE 5. Percentages of Good Scores for Each Test Item of the Early Neonatal Neurobehavioral Scale (ENNS)\* for Infants Whose Mothers Had Received N<sub>2</sub>O or Enflurane Analgesia for Vaginal Delivery, or No Inhalation Analgesia (Controls)

|                                              | 2 h     |                  |           | 24 h    |                  |           |
|----------------------------------------------|---------|------------------|-----------|---------|------------------|-----------|
|                                              | Control | N <sub>2</sub> O | Enflurane | Control | N <sub>2</sub> O | Enflurane |
| Pinprick                                     | 71      | 72               | 82        | 81      | 78               | 77        |
| Sitting                                      | 71      | 56               | 64        | 90      | 100              | 95        |
| Arm recoil                                   | 67      | 78               | 82        | 95      | 94               | 100       |
| Truncal tone                                 | 71      | 88               | 86        | 100     | 88               | 95        |
| General tone                                 | 81      | 88               | 91        | 100     | 100              | 95        |
| Rooting                                      | 48      | 56               | 50        | 71      | 78               | 77        |
| Sucking                                      | 81      | 88               | 91        | 90      | 100              | 95        |
| Moro reflex                                  | 76      | 88               | 86        | 90      | 88               | 86        |
| Sound                                        | 24      | 22               | 41        | 57      | 67               | 55        |
| Placing                                      | 81      | 78               | 82        | 100     | 88               | 73        |
| Alertness                                    | 76      | 50               | 45        | 86      | 94               | 86        |
| Decrement response                           |         |                  |           |         |                  |           |
| Pinprick                                     | 95      | 100              | 91        | 100     | 100              | 91        |
| Moro response                                | 100     | 100              | 100       | 95      | 94               | 100       |
| Light                                        | 100     | 94               | 95        | 95      | 100              | 95        |
| Percentages of good scores on all test items | 75.5    | 76.4             | 78.4      | 90.0    | 90.4             | 88.0      |

\* No significant differences.

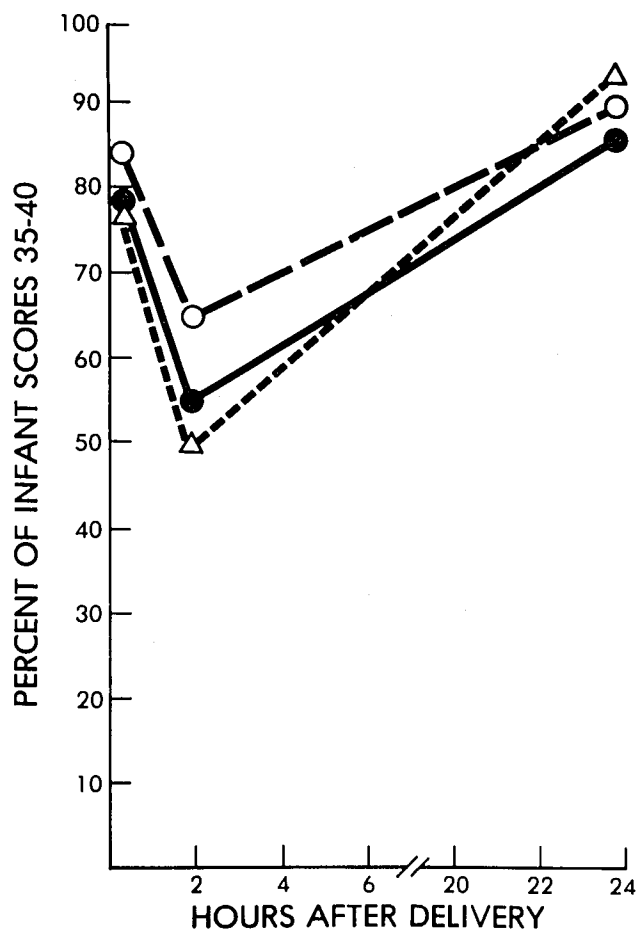FIG. 1. Percentage of NACS scores of 35 to 40 for infants whose mothers had received nitrous oxide ( $\Delta$ ) or enflurane (O) analgesia for vaginal delivery, or no inhalation analgesia (controls [●]).

who scored 35 to 40 on the NACS and the percentage of infants with an overall good ENNS evaluation were similar in both groups (table 6).

### Discussion

When properly administered, inhalation analgesia with agents such as nitrous oxide or enflurane is effective and does not produce depression of the newborn at birth.<sup>8</sup> However, infants of mothers receiving thiopental/nitrous oxide general anesthesia for vaginal delivery or cesarean section have global depression of neurobehavioral performance when compared to those born after regional anesthesia.<sup>9</sup> This difference in neurobehavioral function occurred despite similar Apgar scores for the two anesthetic groups.<sup>9</sup> Our study confirms the safety and effectiveness of inhalation analgesia for vaginal delivery and also demonstrates no adverse neurobehavioral effects on the neonate at 15 min, 2 h, and 24 h after birth. The inspired concentrations of nitrous oxide or enflurane that produce maternal analgesia but not loss of consciousness or surgical anesthesia are probably too low to depress neurobehavioral function in the neonate. We found no apparent synergism between inhalation analgesics and systemic medication administered to the mother. Babies from mothers receiving narcotics within six hours of birth and either nitrous oxide or enflurane for delivery did not have lower scores than those whose mothers had received narcotics without inhalation analgesia. Because our study used small doses of narcotics, our results should not be interpreted as suggesting that using larger doses would have had little effect on neurobehavioral status.

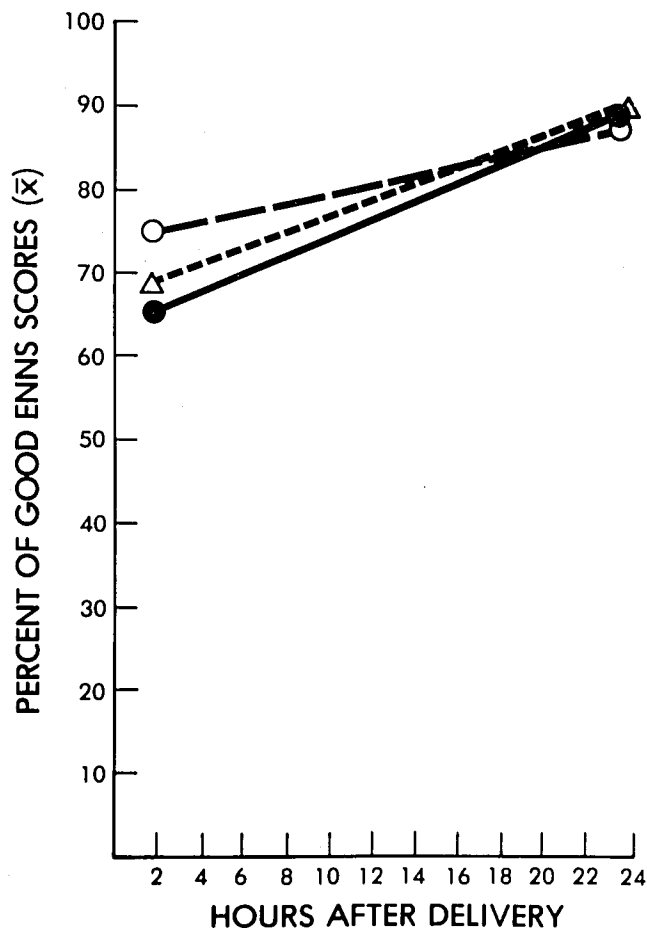

FIG. 2. Mean percentage of good ENNS scores in infants whose mothers received nitrous oxide (Δ) or enflurane (○) analgesia for vaginal delivery, or no inhalation analgesia (controls [●]).

In all three study groups, test performance decreased on both examinations at 2 h compared with 24 h of age. This depression was not greater in infants whose mothers received narcotics alone or in conjunction with inhalation analgesia, but instead, appeared to be relatively uniform in all groups. Similar findings have been reported by McGuinness *et al.*<sup>14</sup> In their study, the neurobehavioral status of infants whose mothers had received bupivacaine epidural anesthesia for cesarean section was compared with that of a control group whose mothers had received tetracaine spinal anesthesia. Although no significant dif-

ferences in neurobehavioral status occurred between the two groups, in both groups infants had decreased tone at 4 h but not at 24 h of age. Klaus and Kennell<sup>15</sup> and Desmond and co-workers<sup>16</sup> report that after birth there is a 45- to 60-min period of infant alertness or "reactivity" that is followed by a three- or four-hour interval of deep sleep and poor responsiveness. Another period of alertness then occurs. Therefore, any test of neurobehavioral status performed two to four hours after birth probably would find the infant less responsive and would reveal decreased neonatal performance.

We conclude that neither enflurane nor nitrous oxide inhalation analgesia adversely affects the neurobehavioral status of the neonate at 15 min, 2 h, or 24 h of age.

References

- Shnider SM, Moya F, Thorndike V, et al: Clinical and biochemical studies of cyclopropane analgesia in obstetrics. *ANESTHESIOLOGY* 24:11-17, 1963
- Moya F: Use of a chloroform inhaler in obstetrics. *NY State J Med* 1:421-429, 1961
- Steffenson J: Inhalation analgesia—nitrous oxide, methoxyflurane, Obstetrical Anesthesia. *Current Concepts and Practice*. Edited by Shnider SM. Baltimore, Williams and Wilkins, 1970, pp 82-87
- Jones PL, Rosen M, Mushin WW, et al: Methoxyflurane and nitrous oxide as obstetric analgesics. II.—A comparison by self-administered intermittent inhalation. *Br Med J* 3:259-262, 1969
- Rosen M, Mushin WW, Jones PL, et al: Field trial of methoxyflurane, nitrous oxide, and trichloroethylene as obstetric analgesics. *Br Med J* 3:263-267, 1969
- Major V, Rosen M, Mushin WW: Methoxyflurane as an obstetric analgesic: A comparison with trichloroethylene. *Br Med J* 2: 1554-1561, 1962
- Gordon RA, Morton MV: Trichloroethylene in obstetrical analgesia and anesthesia. *ANESTHESIOLOGY* 12:680-687, 1951
- Abboud TK, Shnider SM, Wright RG, et al: Enflurane analgesia in obstetrics. *Anesth Analg (Cleve)*: 60:133-137, 1981
- Palahniuk RJ, Scatliff J, Biehl D, et al: Maternal and neonatal effects of methoxyflurane, nitrous oxide, and lumbar epidural anaesthesia for caesarean section. *Can Anaesth Soc J* 24:586-596, 1977
- Hodgkinson R, Marx GF, Kim SS, et al: Neonatal neurobehavioral tests following vaginal delivery under ketamine, thiopental and extradural anesthesia. *Anesth Analg (Cleve)* 56:548-553, 1977
- Scanlon JW: Clinical neonatal neurobehavioral assessment: methods and significance, *Clinical Management of Mothers and Newborn*. Edited by Marx GF. New York, Spring-Verlag, 1977, p 65
- Amiel-Tison C, Barrier G, Shnider SM, et al: A new neurologic and adaptive capacity scoring system for evaluating obstetric medications in full-term newborns. *ANESTHESIOLOGY* 56:340-350, 1982
- Scanlon JW, Brown WU, Weiss JB, et al: Neurobehavioral responses of newborn infants after maternal epidural anesthesia. *ANESTHESIOLOGY* 40:121-128, 1974
- McGuinness GA, Merkow AJ, Kennedy RL, et al: Epidural anesthesia with bupivacaine for cesarean section: Neonatal blood levels and neurobehavioral responses. *ANESTHESIOLOGY* 49:270-273, 1978
- Klaus MH, Kennell JH: *Maternal-Infant Bonding*. St. Louis, CV Mosby, 1976, p 66
- Desmond MM, Rudolph AJ, Phitaksphraiwan P: The transitional care nursery—a mechanism for preventive medicine in the newborn. *Pediatr Clin North Am* 13:651-668, 1966

TABLE 6. Percentages of Infants with Good Neurobehavioral Status: Effects of Narcotic Administration during Labor\*

|              | 15 min NACS | 2 h  |      | 24 h |      |
|--------------|-------------|------|------|------|------|
|              |             | NACS | ENNS | NACS | ENNS |
| No narcotics | 71          | 53   | 69   | 90   | 88   |
| Narcotics    | 89          | 55   | 72   | 90   | 85   |

\* No significant differences.
